# Supplementary material for: Quantitative T2 relaxation time and magnetic transfer ratio predict endplate biochemical content of intervertebral disc degeneration in a canine model
Source: PubMed Central journal article supplement (PMC4485356; doi:10.1186/s12891-015-0610-6), 2015-06-30

# 海军总医院实验动物照护与使用委员会审查同意书

## Affidavit of Approval of Animal Used Protocol

### Navy General Hospital

同意书编号 (NGHACUC Approval No) : 2014-0224

计划申请人: 陈春 职称: 医师

单位: 海军总医院 饲养及应用地点: 海军总医院中心实验室

计划名称: 两种定量核磁量化犬退行性椎间盘终板的生化改变研究

本<动物实验计划书>经实验动物照护与使用委员会形式审查通过。本计划预定饲养应用之动物如下:

| <u>动物种类</u> | <u>动物数量</u> | <u>饲养及应用时间</u>          |
|-------------|-------------|-------------------------|
| 国内本地种属犬     | 18 只        | 2014年03月01日至2014年11月30日 |

The animal use protocol listed below has been reviewed and approved by the Navy General Hospital Animal Care Use Committee(NGHACUC).

Protocol Title: Quantitative T2 Relaxation Time and Magnetic Transfer Ratio Predict Endplate Biochemical Content of Intervertebral Disc Degeneration in a Canine Model

Period of Protocol: Valid From: 03/01/2014 To 12/30/2014 (mm/dd/yyyy)

Principle Investigator(PI): Chun Chen

动物照护与使用委员会主席: 陈春 2014-02-10

NGHACUC Chairman: RuiXue Chen Date: 2014-02-10

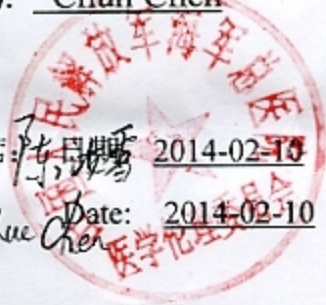

Supplement: 12891_2015_610_MOESM1_ESM.pdf [file 12891_2015_610_MOESM1_ESM.pdf]
